# Supplementary material for: Genotoxicity Revaluation of Three Commercial Nitroheterocyclic Drugs: Nifurtimox, Benznidazole, and Metronidazole
Source: PubMed Central journal article supplement (PMC2963127; doi:10.1155/2009/463575), 2009-10-21
Supplement: 463575.f1.pdf [file 463575.f1.pdf]

## SUPPLEMENTARY DATA

Table I – Revertants induced by Nifurtimox (NFX), Benznidazole (BNZ), and Metronidazole (MTZ) in different *Salmonella* strains, with (+) or without (-) S9 mix. Mean ( $\pm$ SD) of three plates. Compound molarities were calculated taking into account the top-agar volume (2.5ml).

|            | Dose<br>( $\mu$ g/plate) | Dose<br>( $\mu$ M) | TA100<br>-S9    | TA100<br>+S9    | TA100NR<br>-S9 | TA98<br>-S9   | TA98<br>+S9  | TA98NR<br>-S9 |
|------------|--------------------------|--------------------|-----------------|-----------------|----------------|---------------|--------------|---------------|
| <b>NFX</b> | 0                        | 0                  | 170 $\pm$ 25    | 176 $\pm$ 17    | 179 $\pm$ 5    | 15 $\pm$ 1    | 16 $\pm$ 3   | 16 $\pm$ 5    |
|            | 5                        | 7.0                | 618 $\pm$ 10*   | 647 $\pm$ 21*   | 224 $\pm$ 8    | 30 $\pm$ 4    | 32 $\pm$ 4   | 16 $\pm$ 2    |
|            | 10                       | 13.9               | 1100 $\pm$ 24*  | 1145 $\pm$ 13*  | 234 $\pm$ 12   | 39 $\pm$ 8    | 40 $\pm$ 5   | 17 $\pm$ 4    |
|            | 20                       | 27.8               | 1771 $\pm$ 27*  | 1754 $\pm$ 60*  | 302 $\pm$ 10*  | 70 $\pm$ 6*   | 52 $\pm$ 4*  | 20 $\pm$ 4    |
|            | 40                       | 55.7               | 2023 $\pm$ 28*  | 1982 $\pm$ 60*  | 366 $\pm$ 11*  | 126 $\pm$ 10* | 105 $\pm$ 4* | 25 $\pm$ 5    |
|            | 80                       | 111.4              | 1048 $\pm$ 62*  | 1443 $\pm$ 107* | 608 $\pm$ 33*  | 203 $\pm$ 9*  | 181 $\pm$ 8* | 28 $\pm$ 7    |
| <b>BNZ</b> | 0                        | 0                  | 171 $\pm$ 10    | 180 $\pm$ 15    | 183 $\pm$ 7    | 17 $\pm$ 4    | 21 $\pm$ 2   | 22 $\pm$ 2    |
|            | 5                        | 7.7                | 498 $\pm$ 25*   | 406 $\pm$ 13*   | 247 $\pm$ 19   | 10 $\pm$ 2    | 20 $\pm$ 2   | 24 $\pm$ 3    |
|            | 10                       | 15.4               | 943 $\pm$ 27*   | 811 $\pm$ 55*   | 249 $\pm$ 6    | 16 $\pm$ 4    | 18 $\pm$ 2   | 28 $\pm$ 2    |
|            | 20                       | 30.7               | 1801 $\pm$ 67*  | 1445 $\pm$ 85*  | 233 $\pm$ 6    | 14 $\pm$ 6    | 22 $\pm$ 8   | 23 $\pm$ 3    |
|            | 40                       | 61.5               | 3344 $\pm$ 104* | 3117 $\pm$ 169* | 318 $\pm$ 9*   | 15 $\pm$ 1    | 24 $\pm$ 5   | 24 $\pm$ 5    |
|            | 80                       | 123.0              | 5287 $\pm$ 81*  | 4901 $\pm$ 166* | 343 $\pm$ 26*  | 14 $\pm$ 2    | 23 $\pm$ 4   | 27 $\pm$ 3    |
|            | 125                      | 192.1              | nd              | nd              | nd             | 26 $\pm$ 3    | 34 $\pm$ 2   | 30 $\pm$ 3    |
|            | 250                      | 384.2              | nd              | nd              | nd             | 39 $\pm$ 3    | 43 $\pm$ 9   | 46 $\pm$ 9    |
| 500        | 768.5                    | nd                 | nd              | nd              | 45 $\pm$ 5     | 44 $\pm$ 6    | 54 $\pm$ 11  |               |
| <b>MTZ</b> | 0                        | 0                  | 196 $\pm$ 20    | 180 $\pm$ 18    | 205 $\pm$ 3    | 16 $\pm$ 3    | 21 $\pm$ 5   | 21 $\pm$ 7    |
|            | 5                        | 11.7               | 265 $\pm$ 11    | 221 $\pm$ 13    | 217 $\pm$ 8    | 17 $\pm$ 5    | 24 $\pm$ 3   | 17 $\pm$ 4    |
|            | 10                       | 23.4               | 258 $\pm$ 24    | 273 $\pm$ 24    | 190 $\pm$ 23   | 20 $\pm$ 3    | 19 $\pm$ 5   | 20 $\pm$ 4    |
|            | 20                       | 46.7               | 326 $\pm$ 11    | 342 $\pm$ 18*   | 216 $\pm$ 12   | 18 $\pm$ 4    | 21 $\pm$ 5   | 19 $\pm$ 1    |
|            | 40                       | 93.5               | 359 $\pm$ 18*   | 418 $\pm$ 20*   | 217 $\pm$ 24   | 15 $\pm$ 4    | 25 $\pm$ 3   | 18 $\pm$ 2    |
|            | 80                       | 187.0              | 551 $\pm$ 56*   | 576 $\pm$ 14*   | 236 $\pm$ 12   | 18 $\pm$ 2    | 30 $\pm$ 6   | 17 $\pm$ 2    |
|            | 125                      | 292.1              | 1053 $\pm$ 19*  | 1185 $\pm$ 37*  | 256 $\pm$ 31   | 24 $\pm$ 1    | 34 $\pm$ 1   | 22 $\pm$ 5    |
|            | 250                      | 584.3              | 1725 $\pm$ 84*  | 1952 $\pm$ 40*  | 331 $\pm$ 46   | 32 $\pm$ 1*   | 45 $\pm$ 4   | 23 $\pm$ 4    |
| 500        | 1168.6                   | 2666 $\pm$ 168*    | 2777 $\pm$ 91*  | 376 $\pm$ 32*   | 39 $\pm$ 2*    | 64 $\pm$ 4*   | 27 $\pm$ 5   |               |

\* p<0.05 Dunnett's C

nd: not determined

Table II - Mean frequency of Micronuclei (MN) in binucleated cells (BN) and Nuclear Division Index (NDI) in human lymphocytes treated for 24 or 72 hours with BNZ, and MTZ

|                                                                                                                                                                                                                      | Dose<br>( $\mu\text{M}$ ) | NDI             | NDI<br>(%)   | MN<br>( $\times 10^{-3}$ BN) |
|----------------------------------------------------------------------------------------------------------------------------------------------------------------------------------------------------------------------|---------------------------|-----------------|--------------|------------------------------|
| <b>BNZ (24h)</b>                                                                                                                                                                                                     | 0                         | 2.10 $\pm$ 0.10 | 100          | 3.0 $\pm$ 1.0                |
|                                                                                                                                                                                                                      | 1.9                       | 1.99 $\pm$ 0.10 | 95 $\pm$ 5   | 3.0 $\pm$ 0.5                |
|                                                                                                                                                                                                                      | 3.8                       | 1.97 $\pm$ 0.11 | 94 $\pm$ 5   | 4.0 $\pm$ 0.5                |
|                                                                                                                                                                                                                      | 7.7                       | 1.97 $\pm$ 0.07 | 94 $\pm$ 3   | 3.5 $\pm$ 1.0                |
|                                                                                                                                                                                                                      | 15.4                      | 2.00 $\pm$ 0.06 | 95 $\pm$ 3   | 2.5 $\pm$ 0.5                |
|                                                                                                                                                                                                                      | 30.7                      | 2.04 $\pm$ 0.05 | 97 $\pm$ 2   | 4.5 $\pm$ 1.0                |
|                                                                                                                                                                                                                      | 61.5                      | 1.99 $\pm$ 0.07 | 95 $\pm$ 3   | 3.5 $\pm$ 0.5                |
|                                                                                                                                                                                                                      | 96.1                      | 2.01 $\pm$ 0.03 | 96 $\pm$ 1   | 3.0 $\pm$ 0.5                |
|                                                                                                                                                                                                                      | 192.1                     | 2.07 $\pm$ 0.07 | 99 $\pm$ 3   | 5.0 $\pm$ 1.0                |
|                                                                                                                                                                                                                      | 384.2                     | 2.04 $\pm$ 0.10 | 97 $\pm$ 5   | 3.5 $\pm$ 0.5                |
| <b>MTZ (24h)</b>                                                                                                                                                                                                     | 0                         | 2.19 $\pm$ 0.14 | 100          | 3.5 $\pm$ 1.5                |
|                                                                                                                                                                                                                      | 2.9                       | 2.04 $\pm$ 0.12 | 104 $\pm$ 6  | 2.5 $\pm$ 0.5                |
|                                                                                                                                                                                                                      | 5.9                       | 1.97 $\pm$ 0.07 | 100 $\pm$ 4  | 3.0 $\pm$ 1.0                |
|                                                                                                                                                                                                                      | 11.7                      | 1.97 $\pm$ 0.05 | 100 $\pm$ 3  | 2.0 $\pm$ 0.5                |
|                                                                                                                                                                                                                      | 23.4                      | 2.00 $\pm$ 0.06 | 102 $\pm$ 3  | 2.5 $\pm$ 0.5                |
|                                                                                                                                                                                                                      | 46.8                      | 2.01 $\pm$ 0.10 | 102 $\pm$ 5  | 3.0 $\pm$ 0.5                |
|                                                                                                                                                                                                                      | 93.6                      | 1.99 $\pm$ 0.04 | 101 $\pm$ 2  | 4.0 $\pm$ 0.5                |
|                                                                                                                                                                                                                      | 146.2                     | 1.97 $\pm$ 0.10 | 100 $\pm$ 5  | 3.0 $\pm$ 1.0                |
|                                                                                                                                                                                                                      | 292.4                     | 2.01 $\pm$ 0.03 | 102 $\pm$ 2  | 4.0 $\pm$ 1.0                |
|                                                                                                                                                                                                                      | 584.8                     | 1.94 $\pm$ 0.06 | 98 $\pm$ 3   | 3.0 $\pm$ 1.0                |
| <b>MTZ (72h)</b>                                                                                                                                                                                                     | 0                         | 1.74 $\pm$ 0.19 | 100          | 4.0 $\pm$ 1.0                |
|                                                                                                                                                                                                                      | 2.9                       | 1.74 $\pm$ 0.11 | 100 $\pm$ 6  | 3.5 $\pm$ 0.5                |
|                                                                                                                                                                                                                      | 5.9                       | 1.75 $\pm$ 0.17 | 101 $\pm$ 10 | 5.0 $\pm$ 1.0                |
|                                                                                                                                                                                                                      | 11.7                      | 1.74 $\pm$ 0.10 | 100 $\pm$ 6  | 4.5 $\pm$ 1.0                |
|                                                                                                                                                                                                                      | 23.4                      | 1.70 $\pm$ 0.06 | 98 $\pm$ 4   | 4.0 $\pm$ 1.5                |
|                                                                                                                                                                                                                      | 46.8                      | 1.81 $\pm$ 0.09 | 104 $\pm$ 5  | 4.5 $\pm$ 0.5                |
|                                                                                                                                                                                                                      | 93.6                      | 1.73 $\pm$ 0.08 | 100 $\pm$ 5  | 3.0 $\pm$ 0.5                |
|                                                                                                                                                                                                                      | 146.2                     | 1.84 $\pm$ 0.11 | 106 $\pm$ 6  | 4.0 $\pm$ 1.0                |
|                                                                                                                                                                                                                      | 292.4                     | 1.76 $\pm$ 0.07 | 102 $\pm$ 4  | 4.0 $\pm$ 1.5                |
|                                                                                                                                                                                                                      | 584.8                     | 1.74 $\pm$ 0.12 | 100 $\pm$ 7  | 5.0 $\pm$ 1.0                |
| Positive controls - ethyl methane sulfonate (120 $\mu\text{g}/\text{ml}$ ): 15.0 $\pm$ 2.8;<br>bleomycin (6 $\mu\text{g}/\text{ml}$ ): 26.0 $\pm$ 4.0;<br>demecolcine (0.3 $\mu\text{g}/\text{ml}$ ): 65.0 $\pm$ 3.3 |                           |                 |              |                              |

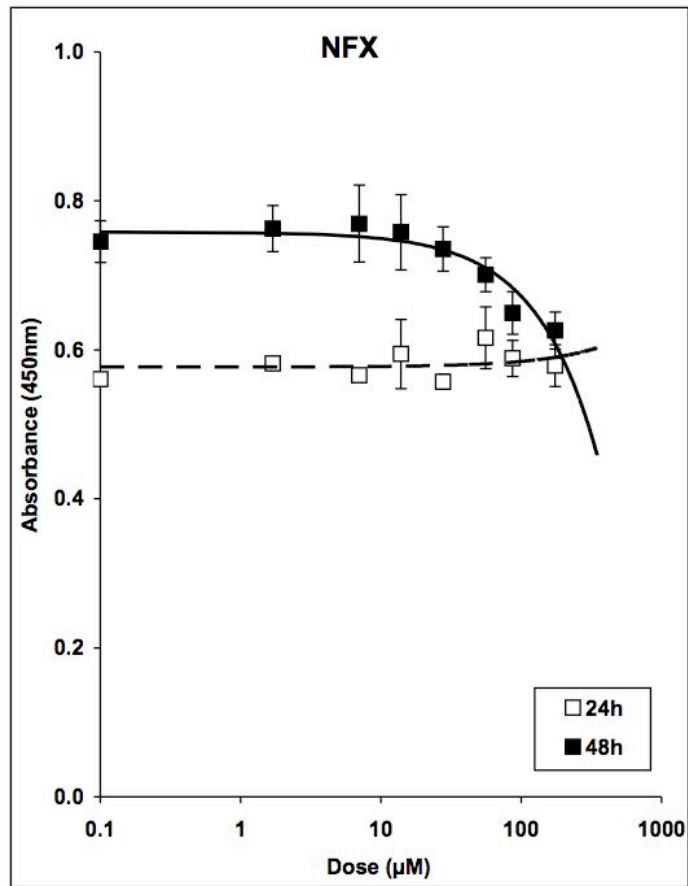

Figure 1 – Cytotoxic effects induced in immortalized NFX 24h- or 48h-treated lymphocytes when detected by MTS assay.

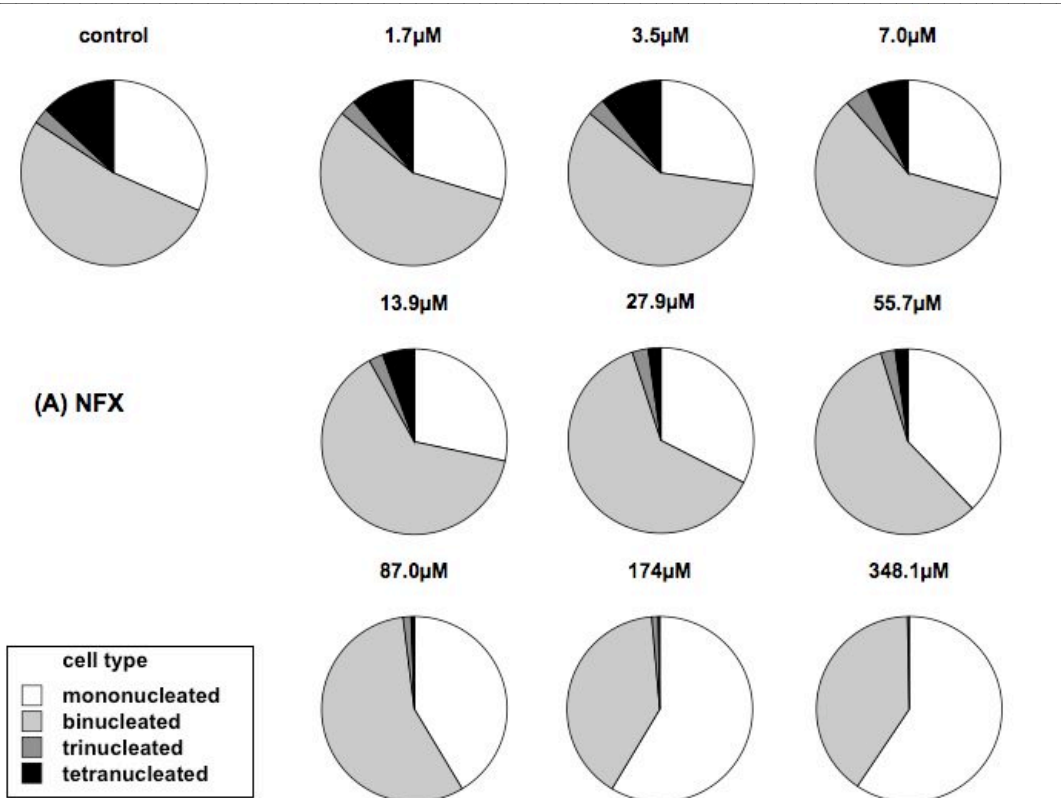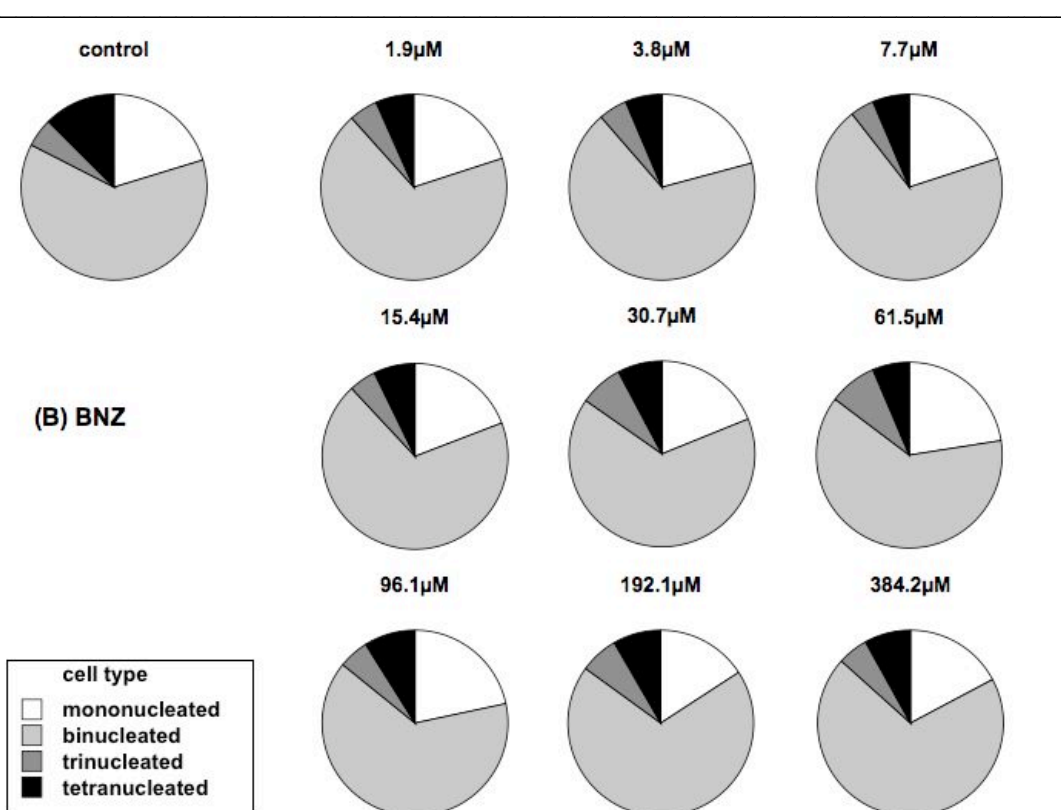

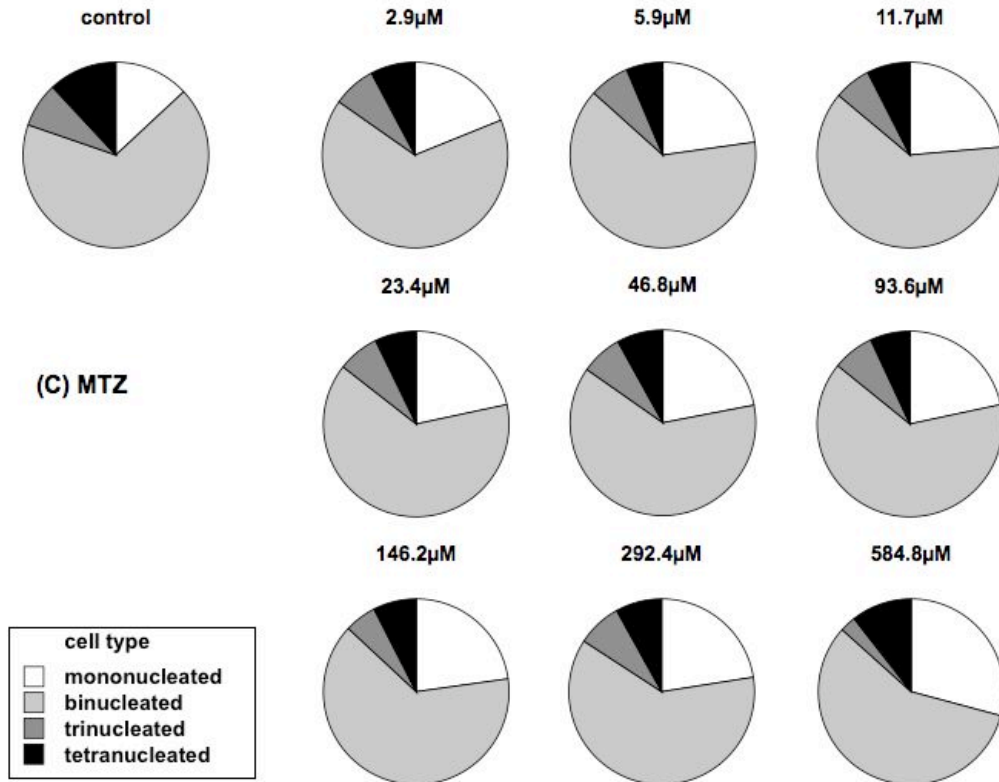

Figure II – MN assay. Percentage of mono-, bi-, tri-, tetranucleated cells within 24h-treated human lymphocytes with NFX (A), BNZ (B), and MTZ (C).
